# Supplementary material for: Altered mRNA Expression of Interleukin-1 Receptors in Myocardial Tissue of Patients with Left Ventricular Assist Device Support
Source: MDPI journal article supplement (doi:10.3390/jcm10214856), 2021-10-22
Supplement: s1 [file s1]

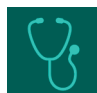

|                                     | DCM (n=38)   | ICM (n=25)  | p-value |
|-------------------------------------|--------------|-------------|---------|
| Gender (male), n (%)                | 30 (78.9%)   | 20 (80.0%)  | n.s.    |
| Age (years)                         | 50 ± 1.8     | 60 ± 1.4    | 0.02    |
| BMI                                 | 27.13 ± 0.95 | 26 ± 1.4    | n.s.    |
| NYHA Class IV                       | 1 (2.6%)     | 3 (8.0%)    | 0.014   |
| III                                 | 9 (23.7%)    | 11 (44.0%)  |         |
| II                                  | 24 (63.2%)   | 10 (40.0%)  |         |
| I                                   | 4 (10.5%)    | 1 (4.0%)    |         |
| LVEF %                              | 22 ± 1.1     | 25 ± 2.0    | n.s.    |
| LVAD, n (%)                         | 20 (52.6%)   | 19 (76.0%)  | n.s.    |
| <b>Comorbidities</b>                |              |             |         |
| Diabetes, n (%)                     | 6 (15.8%)    | 15 (60.0%)  | 0.000   |
| Hypertension, n (%)                 | 14 (36.8%)   | 16 (64.0%)  | 0.044   |
| Dyslipidemia, n (%)                 | 9 (23.7%)    | 7 (28.0%)   | n.s.    |
| Kidney Disease, n (%)               | 21 (55.3%)   | 15 (60.0%)  | n.s.    |
| History of smoking, n (%)           | 3 (7.9%)     | 5 (20.0%)   | n.s.    |
| <b>Pre OP laboratory values</b>     |              |             |         |
| NT-proBNP (pg/ml)                   | 4662 ± 1245  | 3525 ± 1325 | n.s.    |
| Bilirubin (mg/dL)                   | 1.1 ± 0.14   | 1.0 ± 0.25  | n.s.    |
| Creatinine (mg/dL)                  | 1.6 ± 0.29   | 1.3 ± 0.10  | n.s.    |
| Leucocytes (1000/μl)                | 8.6 ± 0.6    | 8.9 ± 0.6   | n.s.    |
| CRP (mg/dL)                         | 1.4 ± 0.3    | 4.1 ± 1.5   | n.s.    |
| <b>Treatments</b>                   |              |             |         |
| ACE-I and/or ARB, n (%)             | 25 (65.7%)   | 10 (40.0%)  | n.s.    |
| Beta blockers, n (%)                | 29 (76.3%)   | 21 (84.0%)  | n.s.    |
| Statins, n (%)                      | 13 (34.2%)   | 17 (68.0%)  | 0.011   |
| Antiplatelet agents, n (%)          | 20 (52.6%)   | 21 (84.0%)  | n.s.    |
| Inotropic support, n (%)            | 2 (5.3%)     | 0 (0%)      | n.s.    |
| MR / Aldosterone antagonists, n (%) | 24 (63.2%)   | 17 (68.0%)  | n.s.    |
| Other diuretics, n (%)              | 28 (73.7%)   | 18 (72.0%)  | n.s.    |
| Antiarrhythmic therapy, n (%)       | 16 (42.1%)   | 4 (16.0%)   | n.s.    |
| antidiabetic agents, n (%)          | 2 (5.3%)     | 7 (28.0%)   | 0.023   |
| Calcium antagonists, n (%)          | 4 (10.5%)    | 7 (28.0%)   | n.s.    |
| PDE5i, n (%)                        | 12 (31.5%)   | 14 (56.0%)  | n.s.    |
| Allopurinol, n (%)                  | 8 (21.1%)    | 5 (20.0%)   | n.s.    |
